# Supplementary material for: Humic Lake Exhibits Higher Microbial Functional Gene Diversity and Weaker Gene Interaction Efficiency than a Common Alkaline Lake
Source: MDPI journal article supplement (doi:10.3390/biology11101448), 2022-10-01

## Supplementary materials

### **“Humic lake exhibits higher microbial functional gene diversity and weaker metabolic interaction efficiency than a common alkaline lake”**

Dan He <sup>1,2,†</sup>, Yuanyuan Liu <sup>3,†</sup>, Qinglong L. Wu <sup>2,4,5</sup>, Yuyang Peng <sup>3</sup>, and Lijuan Ren <sup>2,3,\*</sup>

<sup>1</sup> Guangdong Provincial Key Laboratory of Microbial Culture Collection and Application, State Key Laboratory of Applied Microbiology Southern China, Institute of Microbiology, Guangdong Academy of Sciences, Guangdong Detection Center of Microbiology, Guangzhou, China

<sup>2</sup> State Key Laboratory of Lake Science and Environment, Nanjing Institute of Geography and Limnology, Chinese Academy of Sciences, Nanjing, China

<sup>3</sup> Department of Ecology, Institute of Hydrobiology, Jinan University, Guangzhou, China

<sup>4</sup> Sino-Danish Centre for Education and Research, University of Chinese Academy of Sciences, Beijing, China

<sup>5</sup> Center for Evolution and Conservation Biology, Southern Marine Sciences and Engineering Guangdong Laboratory, Guangzhou, China

\*Corresponding Author: Lijuan Ren

Corresponding Address:

Department of Ecology, Jinan University, Huangpu avenue 601#, Guangzhou, China.

E-mail: [lijuanren@jnu.edu.cn](mailto:lijuanren@jnu.edu.cn)

† The authors contributed equally to this work.

*Short summary:* this file contains 3 supplementary tables (Tables S1-S3) and 5 supplementary figures (Figures S1-S5)

**Table S1.** Full names of the enzyme/protein encoded by the functional gene groups.

| Gene category      | Subcategory                        | Gene name                    | Enzyme/protein encoded            |
|--------------------|------------------------------------|------------------------------|-----------------------------------|
| Carbon fixation    | Reductive tricarboxylic acid cycle | <i>aclB</i>                  | ATP citrate lyase                 |
|                    | Reductive acetyl–CoA pathway       | <i>CODH</i>                  | Carbon monoxide dehydrogenase     |
|                    | Wood–Ljungdahl pathway             | <i>FTHFS</i>                 | Tetrahydrofolate formylase        |
|                    | Calvin cycle                       | <i>rubisco</i>               | RuBisCo                           |
| Methane            | Methanogenesis                     | <i>mcrA</i>                  | Methyl coenzyme M reductase       |
|                    | Methane oxidation                  | <i>mmoX</i>                  | Soluble methane monooxygenase     |
|                    | Methane oxidation                  | <i>pmoA</i>                  | Particulate methane monooxygenase |
| Carbon degradation | Starch                             | <i>amyA</i>                  | Alpha-amylase                     |
|                    | Starch                             | <i>amylx</i>                 | Pullulanase                       |
|                    | Starch                             | <i>apu</i>                   | Amylopullulanase                  |
|                    | Starch                             | <i>cda</i>                   | Cyclomaltodextrinase              |
|                    | Starch                             | <i>glucoamylase</i>          | Glucoamylase                      |
|                    | Starch                             | <i>pulA</i>                  | Pullulanase                       |
|                    | Cellulose                          | <i>cellobiase</i>            | Beta-glucosidase                  |
|                    | Cellulose                          | <i>endoglucanase</i>         | Endoglucanase                     |
|                    | Cellulose                          | <i>exoglucanase</i>          | Exoglucanase                      |
|                    | Hemicellulose                      | <i>ara</i>                   | Arabinofuranosidase               |
|                    | Hemicellulose                      | <i>mannanase</i>             | Beta-mannanase                    |
|                    | Hemicellulose                      | <i>xylA</i>                  | Xylose isomerase                  |
|                    | Hemicellulose                      | <i>xylanase</i>              | Xylanase                          |
|                    | Chitin                             | <i>acetylglucosaminidase</i> | Acetylglucosaminidase             |

|          |                           |                       |                                                  |
|----------|---------------------------|-----------------------|--------------------------------------------------|
|          | Chitin                    | <i>chitinase</i>      | chitinase                                        |
|          | Chitin                    | <i>endochitinase</i>  | Endochitinase                                    |
|          | Chitin                    | <i>exochitinase</i>   | Exochitinase                                     |
|          | Aromatics                 | <i>camDCAB</i>        | Camphor 5-monooxygenase                          |
|          | Aromatics                 | <i>limEH</i>          | Limonene-1,2-epoxide hydrolase                   |
|          | Aromatics                 | <i>LMO</i>            | limonene monooxygenase                           |
|          | Aromatics                 | <i>vanA</i>           | Vanillate demethylase                            |
|          | Aromatics                 | <i>vdh</i>            | Aryl-aldehyde oxidase                            |
|          | Lignin                    | <i>glx</i>            | Glyoxal oxidase                                  |
|          | Lignin                    | <i>ligninase</i>      | Lignin peroxidase                                |
|          | Lignin                    | <i>mnp</i>            | Manganese peroxidase                             |
|          | Lignin                    | <i>phenol_oxidase</i> | Phenol oxidase                                   |
| Nitrogen | Ammonification            | <i>gdh</i>            | Glutamate dehydrogenase                          |
|          | Ammonification            | <i>ureC</i>           | Urease                                           |
|          | Anammox                   | <i>hzo</i>            | Hydrazine oxidoreductase                         |
|          | Assimilatory N reduction  | <i>nasA</i>           | Assimilatory nitrate reductase catalytic subunit |
|          | Assimilatory N reduction  | <i>nirA</i>           | Nitrite reductase (NAD(P)H)                      |
|          | Assimilatory N reduction  | <i>nirB</i>           | Nitrite reductase (NAD(P)H)                      |
|          | Denitrification           | <i>narG</i>           | Respiratory nitrate reductase alpha chain        |
|          | Denitrification           | <i>nirS</i>           | Cytochrome cd1 nitrite reductas                  |
|          | Denitrification           | <i>norB</i>           | Nitric oxide reductase                           |
|          | Denitrification           | <i>nosZ</i>           | Nitrous oxide reductase                          |
|          | Denitrification           | <i>nirK</i>           | Copper containing nitrite reductase              |
|          | Dissimilatory N reduction | <i>napA</i>           | Periplasmic nitrate reductase                    |
|          | Dissimilatory N reduction | <i>nrfA</i>           | Ammonia-forming cytochrome c nitrite reductase   |

|            |                           |                 |                                                      |
|------------|---------------------------|-----------------|------------------------------------------------------|
|            | Nitrification             | <i>hao</i>      | Hydroxylamine oxidoreductase                         |
|            | Nitrification             | <i>amoA</i>     | Ammonia monooxygenase                                |
|            | Nitrogen fixation         | <i>nifH</i>     | Nitrogenase iron protein                             |
| Phosphorus | Phytic acid hydrolysis    | <i>phytase</i>  | Phytase                                              |
|            | Polyphosphate synthesis   | <i>ppk</i>      | Polyphosphate kinase                                 |
|            | Polyphosphate degradation | <i>ppx</i>      | Exopolyphosphatase                                   |
| Sulfur     | Adenylylsulfate reductase | <i>APS_AprA</i> | Adenylylsulfate reductase                            |
|            | Adenylylsulfate reductase | <i>APS_AprB</i> | Adenylylsulfate reductase                            |
|            | Sulfide oxidation         | <i>fccAB</i>    | Flavocytochrome c sulfide dehydrogenase              |
|            | Sulfide oxidation         | <i>sqr</i>      | Sulfide-quinone oxidoreductase                       |
|            | Sulfite reductase         | <i>CysJ</i>     | Sulfite reductase (NADPH) flavoprotein subunit alpha |
|            | Sulfite reductase         | <i>dsrA</i>     | Dissimilatory sulfite reductase                      |
|            | Sulfite reductase         | <i>sir</i>      | Sulfite reductase (ferredoxin)                       |
|            | Sulfur oxidation          | <i>sox</i>      | Sulfur oxidation cycle enzymes                       |

**Table S2.** Nonparametric multivariate statistical tests for microbial functional structure in the HL and the RAL. Bolded numbers represent  $P < 0.01$ .

| Index                        | MRPP     |              | ANOSIM |              | ADONIS |              |
|------------------------------|----------|--------------|--------|--------------|--------|--------------|
|                              | $\delta$ | $P$          | R      | $P$          | F      | $P$          |
| Bray–Curtis<br>dissimilarity | 0.147    | <b>0.004</b> | 0.520  | <b>0.002</b> | 5.598  | <b>0.002</b> |
| Jaccard<br>dissimilarity     | 0.215    | <b>0.003</b> | 0.546  | <b>0.004</b> | 5.575  | <b>0.004</b> |

**Table S3.**The clades with 1% higher relative abundance in the HL than in the RAL.

| Genus                      | HL     | RAL   | Differences in relative abundance |
|----------------------------|--------|-------|-----------------------------------|
| <i>Lelliottia</i>          | 12.36% | 0.00% | 12.36%                            |
| <i>Pseudomonas</i>         | 8.27%  | 2.22% | 6.05%                             |
| <i>Edaphobaculum</i>       | 4.84%  | 0.58% | 4.25%                             |
| <i>Comamonadaceae</i>      | 3.71%  | 0.08% | 3.63%                             |
| <i>Sphingobacteriaceae</i> | 7.90%  | 4.36% | 3.53%                             |
| <i>Rhodobacter</i>         | 2.61%  | 0.00% | 2.61%                             |
| <i>Microbacteriaceae</i>   | 4.20%  | 1.62% | 2.58%                             |
| <i>Paenibacillus</i>       | 2.49%  | 0.15% | 2.34%                             |
| <i>Sediminibacterium</i>   | 2.45%  | 0.27% | 2.18%                             |
| <i>Methyloparacoccus</i>   | 1.76%  | 0.00% | 1.76%                             |
| <i>Serratia</i>            | 1.63%  | 0.46% | 1.18%                             |
| <i>Legionella</i>          | 1.65%  | 0.54% | 1.11%                             |
| <i>Prostheco bacter</i>    | 1.03%  | 0.04% | 1.00%                             |

**Figure S1.** Taxa–function relationships for carbon-cycling genes. Differences in relative signal intensity between a humic lake and a weakly alkaline lake were shown in the figure. i: carbon fixation, ii: methane, iii: common carbon degradation, iv: aromatic and lignin degradation.

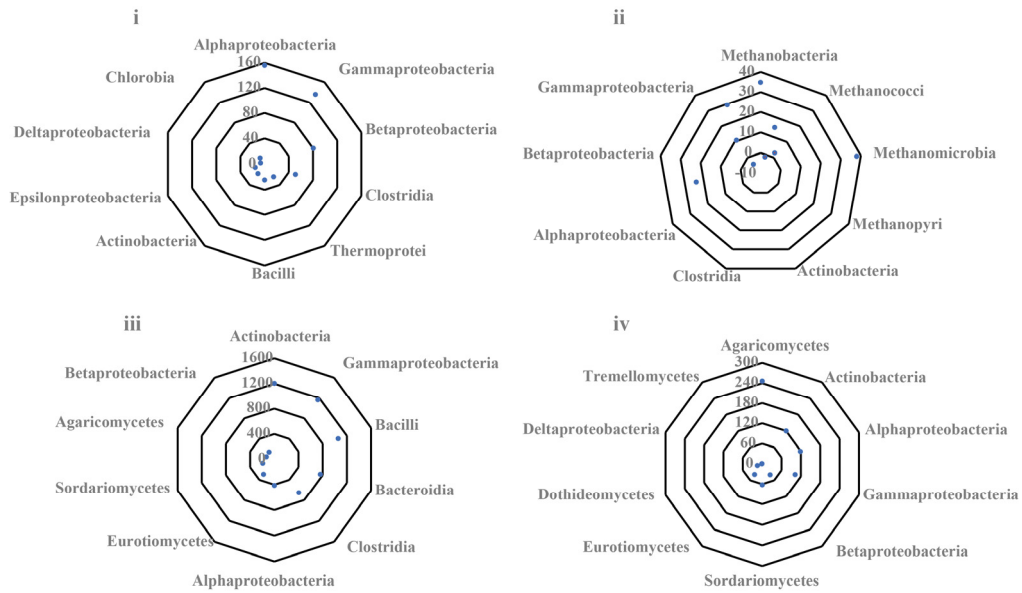

**Figure S2.** The differences in the total intensities of certain biogeochemical cycling processes between the HL and the RAL, calculated by relative gene signal intensity. A, carbon fixation process and methane cycling. i: autotrophic, ii: acetogenesis, iii: methanogenesis, iv: methane oxidation. B, carbon degradation processes. i: starch, ii: hemicellulose, iii: cellulose, iv: chitin, v: aromatic, vi: lignin. C, nitrogen cycle. i: nitrogen fixation, ii: ammonification, iii: denitrification, iv: nitrification, v: assimilation N reduction, vi: dissimilation N reduction, vii: anammox. D, phosphorus cycle, sulfur cycle and metal metabolism. i: Phosphorus cycle, and sulfur cycle (ii: adenylate sulfate reductase, iii: sulfide oxidation, iv: sulfite reduction, v: sulfur oxidation). The “\*” and “\*\*” indicate significant differences in gene intensities with  $P < 0.05$  and  $P < 0.01$ , respectively, in the student t test.

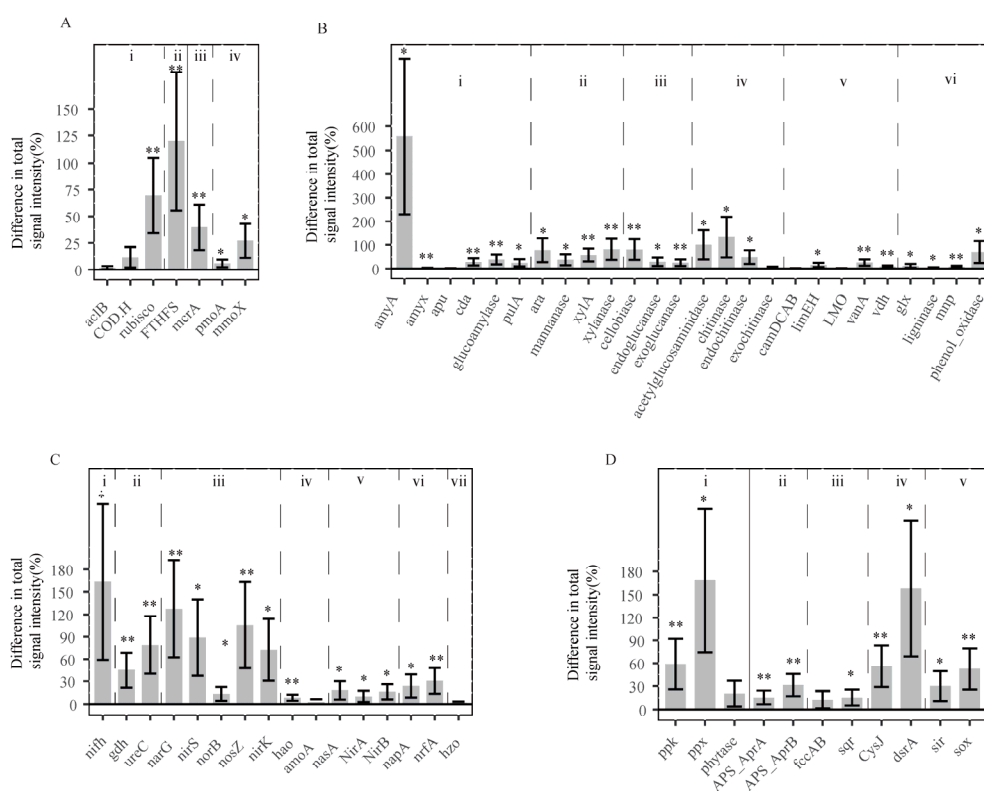



**Figure S3.** Taxa–function relationships for nitrogen-cycling genes. Differences in relative signal intensity between a humic lake and a weakly alkaline lake were shown in the figure. i: nitrogen fixation, ii: ammonification iii: denitrification, iv: nitrification, v: assimilation N reduction, and vi: dissimilation N reduction.

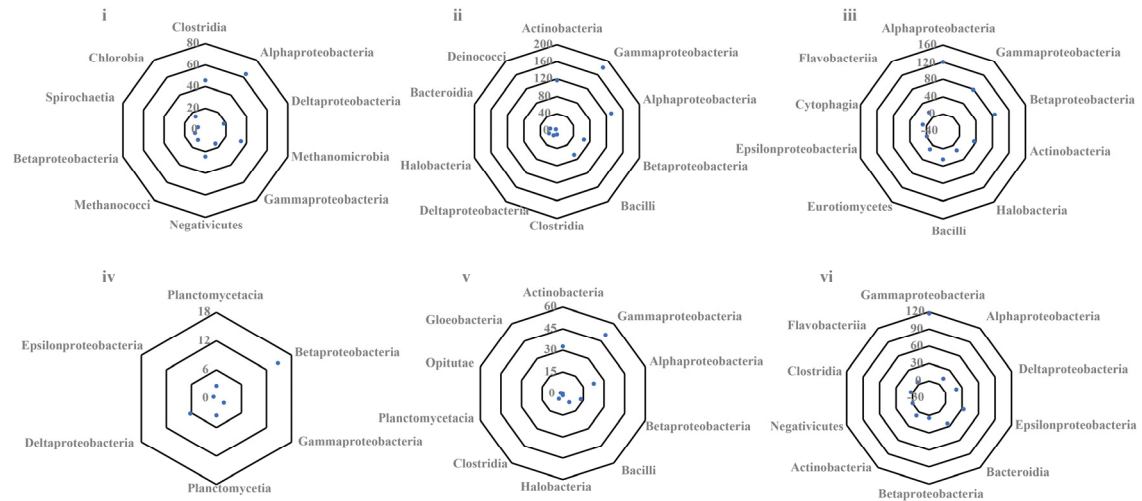

**Figure S4.** Taxa–function relationships for phosphorus and sulfur cycling genes. Differences in relative signal intensity between a humic lake and a weakly alkaline lake were shown in the figure. i: phosphorus cycle, ii: adenylate sulfate reductase, iii: sulfide oxidation, iv: sulfite reduction, v: sulfur oxidation.

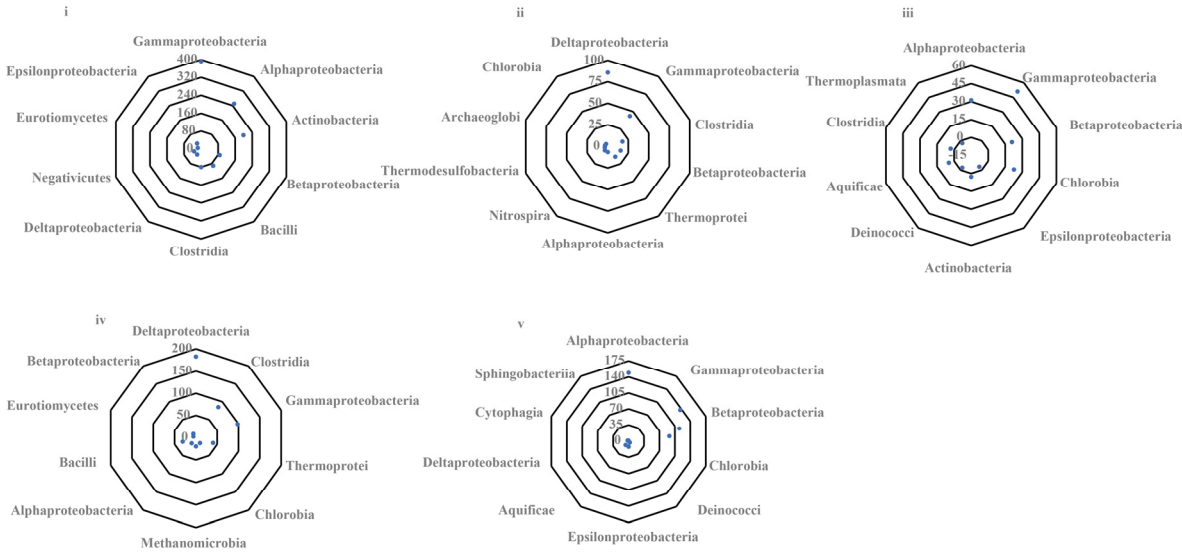

**Figure S5.** The distribution of microbial taxonomic compositions in the HL and the RAL (A: phylum, B: class).

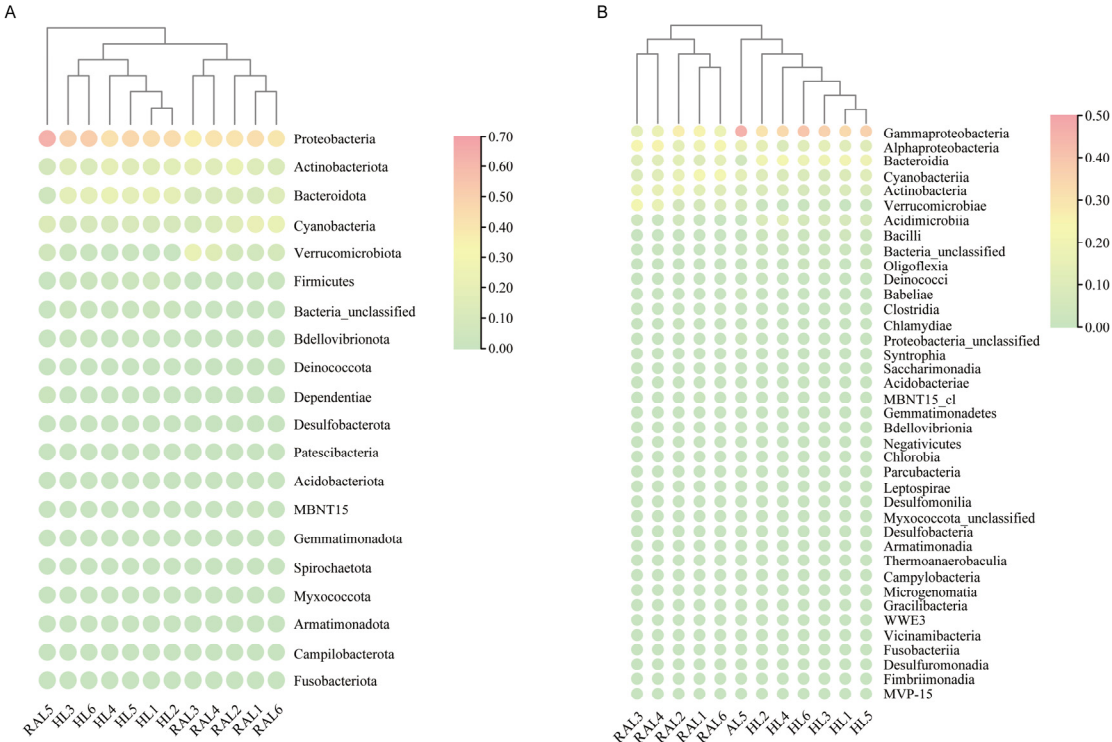

Supplement: s1 [file s1]
